# Supplementary material
Source: PubMed Central journal article supplement (PMC3311396)
Supplement: 1202421109_pnas.201202421SI.pdf [file 1202421109_pnas.201202421SI.pdf]

# Supporting Information

## Shi and Ruvkun 10.1073/pnas.1202421109

### SI Materials and Methods

**Caenorhabditis elegans Strains.** The following strains were used in this study:

N2: wild type  
VT460: *lin-4(e912)/mnC1 dpy-10(e128) unc-52(e444) II*  
GR1575: *lin-14(n355n679) X*  
RG365: *him-1(e879) I; veIs13[col-19::gfp; rol-6(su1006)] V*  
GR1445: *veIs13 V; let-7(mg279) X*  
RB574: *alg-2(ok304) II*  
VC446: *alg-1(gk214) X*  
MH2385: *ain-1(ku322) X*  
GR1332: *let-7(mg279) X*  
GR1694: *hmgr-1(tm4368) III; veIs13 V; let-7(mg279) X*  
GR1696: *hmgr-1(tm4368) III*  
GR1716: *xbp-1(zc12) III; veIs13 V; let-7(mg279) X*  
BW1932: *ctIs39[hbl-1::gfp, pRF4(rol-6(su1006))] I*  
GR1737: *hmgr-1(tm4368) III; ctIs39*  
GR1738: *lin-41(ma104) I; veIs13 V*  
GR1739: *lin-42(n1089) II; veIs13 V*  
GR1740: *lin-28(n719) I; veIs13 V*  
*Is[alg-1p::gfp::alg-1]* (from the Slack laboratory, Yale University, New Haven, CT)  
*Is[ain-1::gfp, dsred2::alg-1]* (from the Han laboratory, University of Colorado, Boulder, CO)  
GR1709: *otIs114[lim-6p::gfp + rol-6(su1006)] I; lsy-6(ot150) V; nre-1(hd20) lin-15b(hd126) X*  
GR1710: *otIs114[lim-6p::gfp + rol-6(su1006)] I; nre-1(hd20) lin-15b(hd126) X*  
GR1832: *mgSi21[alg-1p::HA::alg-1::alg-1-3' UTR] IV; alg-1(gk214) X*

**Feeding RNAi.** In addition to the RNAi clones used in Table S3, the following gene was knocked down by feeding RNAi using the Ahringer RNAi library (1): *F48F7.1 (alg-1/Argonaute)*, which probably also targets *alg-2* due to the high sequence similarity, and therefore is referred to as *alg-1/2* RNAi. HT115 bacteria carrying the empty vector L4440, which expresses dsRNA homologous to no worm gene, were used as a control. Bacterial clones were cultured at 37 °C for 15 h before seeding the RNAi plates. After induction of dsRNA for 24 h at room temperature, worms were placed on RNAi plates.

**LIN-14 Western Blots.** Because *hmgs-1* is an essential gene for fertility, we applied a mild gene knockdown by feeding the parental ( $P_0$ ) animals with *Escherichia coli* expressing *hmgs-1* dsRNA diluted with control *E. coli* expressing dsRNA homologous to no worm gene, starting at the fourth (L4) larval stage. Embryos were isolated from the  $P_0$  animals to synchronize their progeny by

hatching in the absence of food. A fraction of synchronized L1s were flash-frozen in liquid nitrogen and others were fed on plates seeded with undiluted RNAi bacteria at 20 °C and collected after 20 and 23 h. At 24 h, worms were visually inspected to ensure they were all at the early L2 stage by counting the number of germ cells, the divided intestinal nuclei, and disappearance of L1 alae. Worm lysate preparation and LIN-14 Western blotting were performed as previously described (2). Blots were reprobbed with actin antibody (Abcam; ab3280) as loading control.

**Quantification of MicroRNA by Real-Time PCR.** The following procedure was adapted from ref. 3. RNA was isolated, DNase-treated, and polyadenylated by poly(A) polymerase. An adapter primer containing a unique 5' sequence and 12 Ts and ending in VN-3' was used to make cDNA. This anchors the adapter to the beginning of the poly(A) tail by virtue of the VN-3' nucleotides (V = A, C, or G; n = A, T, C, or G). The cDNA is then amplified with a forward primer based on the entire tested microRNA (miRNA) sequence and a reverse primer complementary to the adapter. The PCR amplification was monitored by SYBR Green incorporation, and a corresponding threshold cycle ( $C_T$ ) was obtained. The quantity of miRNA, relative to two internal reference genes, U6 and 18s rRNA, was calculated using the formula  $2^{-\Delta C_T}$ , where  $\Delta C_T = (C_{T \text{ miRNA}} - C_{T \text{ reference}})$ . For each miRNA, the result was shown relative to its level in wild-type animals treated with control RNAi. The mean and SD were calculated from three biological replicates.

**ALG-1 Immunoprecipitation.** ALG-1 was purified from synchronized L4-stage *alg-1(gk214)* mutants rescued with an HA-ALG-1 single-copy construct. About 0.5 mL of worms was flash-frozen in liquid nitrogen, followed by grinding with a mortar and pestle. An equal volume of cell lysis buffer [50 mM Tris-HCl (pH 7.4), 100 mM KCl, 2.5 mM MgCl<sub>2</sub>, 0.1% Nonidet P-40, 0.5 mM PMSF, 1 Complete proteinase inhibitor tablet (Roche)/15 mL, 40 U/mL RNaseOUT (Invitrogen)] was added, and the lysate was homogenized on a head-to-tail rotor for 15 min. Debris was spun down in a tabletop centrifuge at 12,000 × g for 5 min at 4 °C. The cell lysate was precleared by adding 20 μL protein A agarose bead slurry (Roche) and rotating for 10 min. The cleared lysate was incubated with 3 μL HA antibody (clone 12CA5; Roche) for 20 min and then 100 μL protein A agarose bead slurry for 20 min at 4 °C. The beads were then washed eight times for 40 min in total. Ten percent of the immunoprecipitation (IP) sample was used for Western blot analysis. Ninety percent of the IP sample was treated with proteinase K (1.0 μg/μL; Ambion) at 65 °C for 15 min. RNA was extracted with phenol-chloroform and subjected to miRNA real-time PCR analysis.

1. Kamath RS, et al. (2003) Systematic functional analysis of the *Caenorhabditis elegans* genome using RNAi. *Nature* 421:231–237.  
2. Reinhart BJ, Ruvkun G (2001) Isoform-specific mutations in the *Caenorhabditis elegans* heterochronic gene *lin-14* affect stage-specific patterning. *Genetics* 157(1):199–209.

3. Shi R, Chiang VL (2005) Facile means for quantifying microRNA expression by real-time PCR. *Biotechniques* 39:519–525.

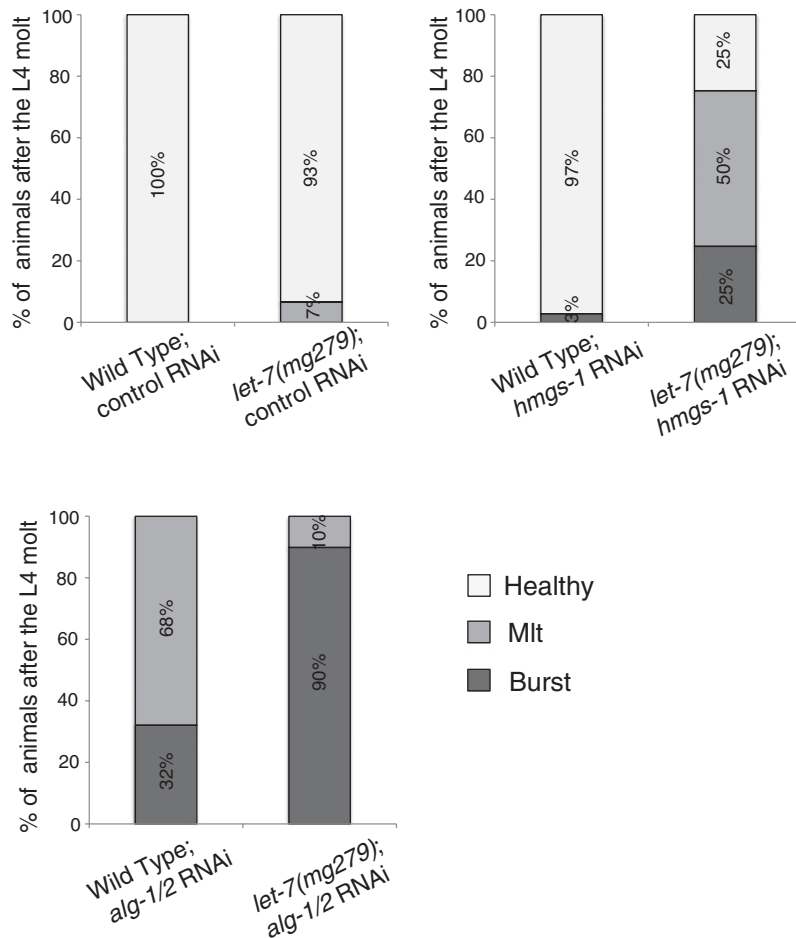

**Fig. S1.** The percentage of molting-defective (Mlt) and burst animals upon a mild knockdown of *hmgs-1* or *alg-1/2* by diluted RNAi is enhanced by the *let-7(mg279)* mutation. Shown are the percentage of healthy, Mlt, and burst animals after the L4-to-adult molt in wild type and *let-7(mg279)* mutants. Mlt animals retain eggs following a defective molt and are eventually consumed by their progeny. Animals were fed starting at L1 with *E. coli* expressing *hmgs-1* or *alg-1/2* dsRNA diluted with control *E. coli* expressing a benign dsRNA and scored after the L4-to-adult molt. The percentage of burst and Mlt animals is enhanced in the *let-7(mg279)* mutant compared with wild type when fed with diluted *hmgs-1* or *alg-1/2* RNAi.

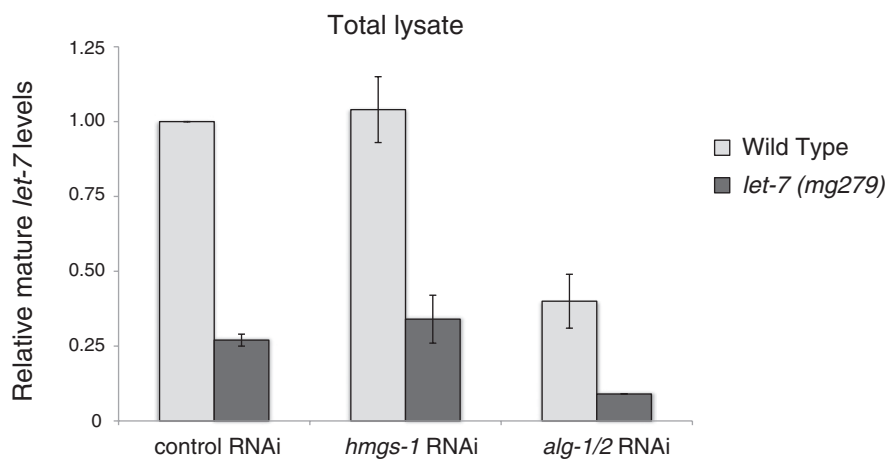

**Fig. S2.** Inactivation of *hmgs-1* does not reduce *let-7* miRNA levels in the sensitized *let-7(mg279)* mutant background. The mature *let-7* level was measured by real-time PCR and is shown relative to its level in wild-type animals treated with control RNAi. Compared with stage-matched wild-type animals, the *let-7(mg279)* mutant has a reduced level of mature *let-7* miRNA. Inactivation of *alg-1/2* further reduces the *let-7* miRNA level; however, inactivation of *hmgs-1* does not reduce the *let-7* miRNA level even in the sensitized *let-7(mg279)* mutant. The mean and SD were calculated from three biological replicates. Error bars represent SEM.

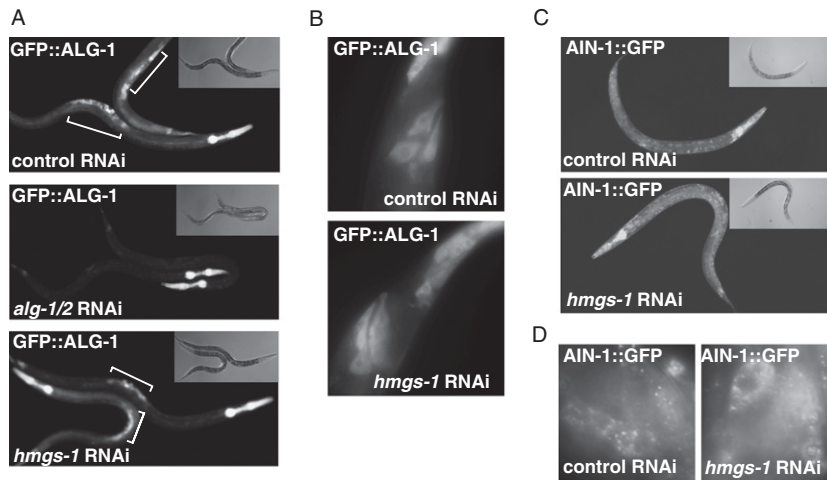

**Fig. S3.** *hmgs-1* does not regulate the overall expression pattern or subcellular localization of ALG-1/Argonaute and AIN-1/ALG-1 interacting proteins. (A) Global GFP::ALG-1 expression in control, *alg-1/2*, or *hmgs-1* RNAi-treated L4 animals. Brackets indicate the vulval and somatic gonadal expression of GFP::ALG-1 in control and *hmgs-1* but not *alg-1/2* RNAi-treated animals. (Insets) Nomarski images. (B) Shown are several cells in the tail region. GFP::ALG-1 is largely diffuse in the cytoplasm. This pattern is not affected upon RNAi depletion of *hmgs-1*. (C) AIN-1::GFP is ubiquitously expressed in L4 animals, with the highest expression in the head neurons. This pattern is not affected upon RNAi depletion of *hmgs-1*. (Insets) Nomarski images. (D) Shown are several cells in the tail region. AIN-1::GFP exhibits punctate cellular localization, and this pattern is not affected upon RNAi depletion of *hmgs-1*.

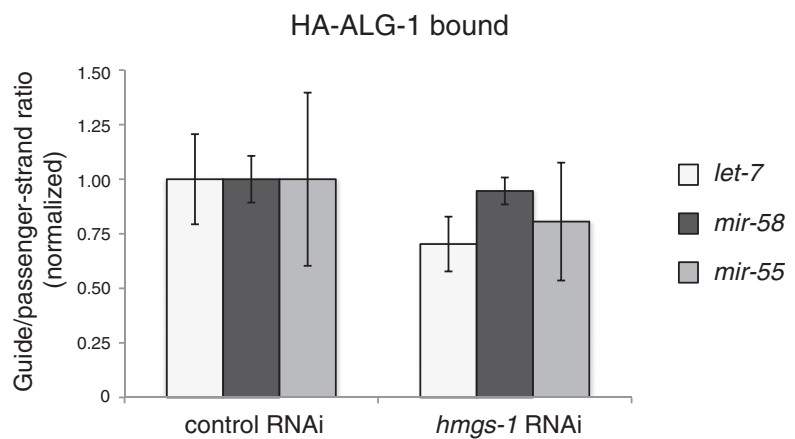

**Fig. S4.** The unwinding of the miRNA duplex is not affected by inactivation of *hmgs-1*. The guide:passenger strand ratio of *let-7*, *mir-58*, and *mir-55* was unaltered after inactivation of *hmgs-1*. HA-ALG-1 was immunoprecipitated, and then the levels of associated guide and passenger strand of *let-7*, *mir-58*, and *mir-55* were measured by real-time PCR. The results were normalized to the mean guide:passenger strand ratio in control RNAi-treated animals. The mean and SD were calculated from three biological replicates. Error bars represent SEM.

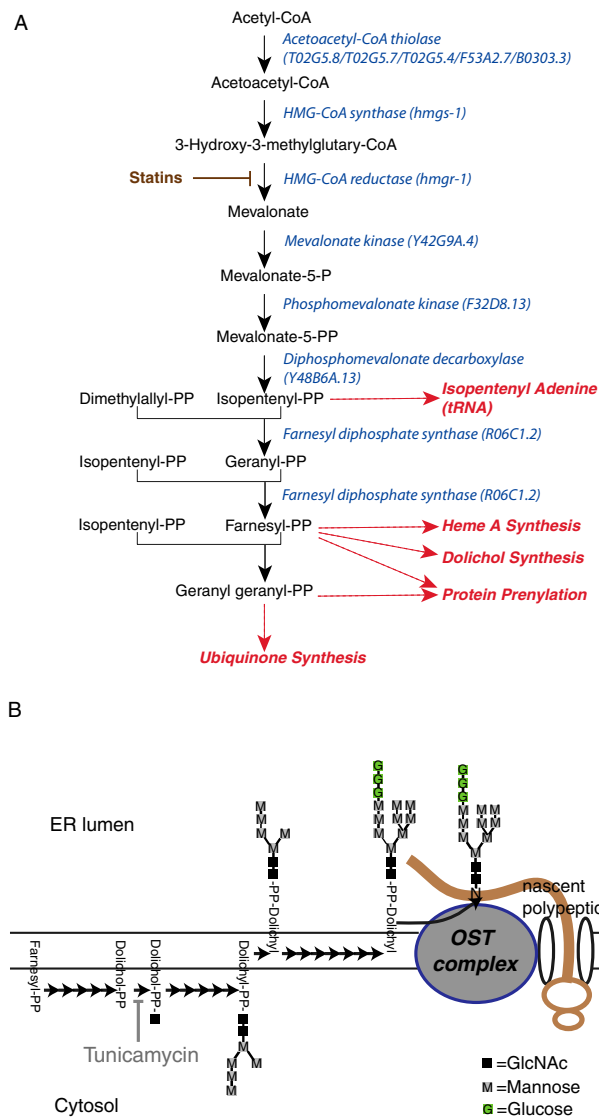

**Fig. S5.** Dolichol phosphate is synthesized from the mevalonate pathway and has a role in protein *N*-linked glycosylation. (A) Diagram of the *C. elegans* mevalonate pathway. (B) Dolichol phosphate synthesized from the mevalonate pathway serves as the lipid carrier of the oligosaccharide moiety destined for protein *N*-linked glycosylation. The transfer of oligosaccharide to an asparagine residue on a nascent polypeptide is catalyzed by the oligosaccharyltransferase (OST) complex on the endoplasmic reticulum (ER) membrane. Tunicamycin blocks the reaction of UDP-GlcNAc and dolichol phosphate in the first step of the dolichol pathway.

**A**

| Gene Inactivation | Description                             | <i>hsp-4::gfp</i> expression | Defect in down-regulation of <i>hbl-1::gfp</i> [% (n)] <sup>a</sup> | Defect in <i>col-19::gfp</i> expression [% (n)] <sup>b</sup> |                                  |
|-------------------|-----------------------------------------|------------------------------|---------------------------------------------------------------------|--------------------------------------------------------------|----------------------------------|
|                   |                                         |                              |                                                                     | <i>let-7(mg279)</i>                                          | <i>xbp-1(zc12); let-7(mg279)</i> |
| control           |                                         | very low                     | 0% (12)                                                             | 13% (195)                                                    | 0% (110)                         |
| <i>Y54E10BR.5</i> | signal peptidase                        | high                         | 0% (12)                                                             | 83% (86)                                                     | 0% (88)                          |
| <i>arf-3</i>      | ADP-ribosylation factor related protein | high                         | 0% (12)                                                             | 80% (85)                                                     | 72% (100)                        |
| <i>fat-6</i>      | delta-9 fatty acid desaturase           | high                         | 0% (8)                                                              | 10% (80)                                                     | 65% (82)                         |
| <i>fah-1</i>      | putative fumarylacetoacetate hydrolase  | medium                       | 0% (10)                                                             | 38% (77)                                                     | 0% (87)                          |
| <i>pdi-3</i>      | disulfide isomerase                     | medium                       | 0% (12)                                                             | 87% (83)                                                     | 0% (90)                          |
| <i>sams-1</i>     | S-adenosylmethionine synthetase         | high                         | nd                                                                  | 6% (73)                                                      | 0% (82)                          |
| <i>tkt-1</i>      | Transketolase                           | high                         | nd                                                                  | 1% (100)                                                     | 0% (87)                          |
| <i>ero-1</i>      | ER-associated oxidoreductin             | high                         | nd                                                                  | 10% (90)                                                     | 0% (83)                          |

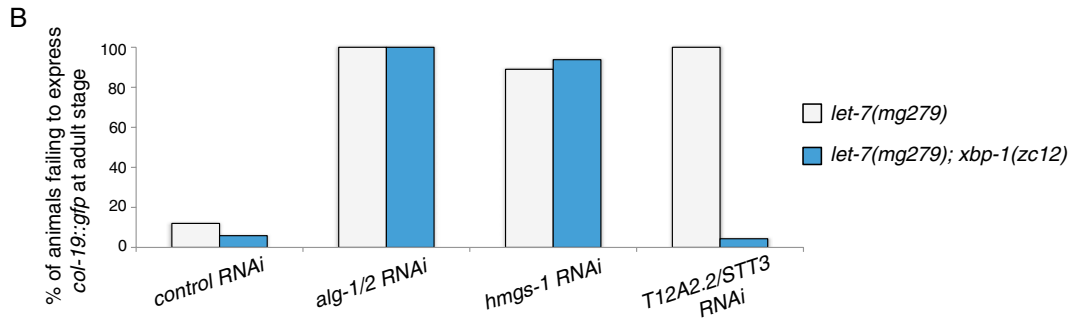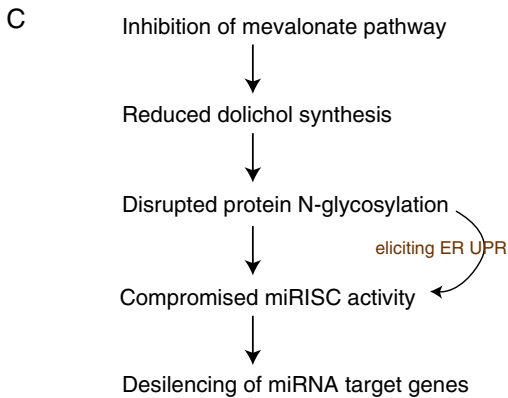

**Fig. S6.** Induction of ER stress mildly compromises *let-7* activity. (A) Inactivation of genes required for ER homeostasis causes up-regulation of *hsp-4/BiP::gfp*, the hallmark of ER stress. These gene inactivations do not cause a defect in the down-regulation of *hbl-1::gfp* at the L3 stage. However, a subset of gene inactivations causes *let-7(mg279)* mutant animals to fail to express *col-19::gfp* in hyp7 cells at the adult stage. In some but not all cases, this defect of *col-19::gfp* expression can be suppressed by the *xbp-1(zc12)* mutation. nd, not determined. <sup>a</sup>The expression of *hbl-1::gfp* in hyp7 cells was scored at the late L3 stage, and the percentage of animals having derepressed *hbl-1::gfp* is indicated. <sup>b</sup>The expression of *col-19::gfp* was scored at the adult stage, and the percentage of animals failing to express *col-19::gfp* in hyp7 cells is indicated. (B) Shown is the percentage of animals failing to express *col-19::gfp* in hyp7 cells at the adult stage. The *xbp-1(zc12)* mutation suppresses the failure of *col-19::gfp* expression in *T12A2.2/STT3* RNAi-treated *let-7(mg279)* mutants. However, *xbp-1(zc12)* does not suppress the failure of *col-19::gfp* expression caused by the inactivation of *alg-1/2* or *hmgs-1*. (C) The dolichol phosphate/protein *N*-glycosylation output of the mevalonate pathway is required in the miRNA repression of target mRNAs in *C. elegans*. miRISC, miRNA-induced silencing complex.

**Table S1. Effect of *hmgs-1* inactivation on hypodermal cell fate specification**

| Strain              | RNAi          | % of animals having adult alae* |        |          | <i>n</i> |
|---------------------|---------------|---------------------------------|--------|----------|----------|
|                     |               | No alae                         | Gapped | Complete |          |
| Wild type           | Control       | 0                               | 0      | 100      | 30       |
| Wild type           | <i>hmgs-1</i> | 9                               | 3      | 88       | 32       |
| <i>alg-1(gk214)</i> | Control       | 45                              | 55     | 0        | 20       |
| <i>alg-1(gk214)</i> | <i>hmgs-1</i> | 100                             | 0      | 0        | 20       |
| <i>alg-2(ok304)</i> | Control       | 0                               | 0      | 100      | 15       |
| <i>alg-2(ok304)</i> | <i>hmgs-1</i> | 21                              | 29     | 50       | 24       |
| <i>ain-1(ku322)</i> | Control       | 10                              | 38     | 52       | 21       |
| <i>ain-1(ku322)</i> | <i>hmgs-1</i> | 67                              | 28     | 5        | 21       |

\*The percentages of animals having no/gapped/complete alae structures were assessed after the L4-to-adult molt; only one side of each animal was assayed.

**Table S2. Mevalonate supplementation rescues gene inactivation of *hmgs-1***

| RNAi                | No supplementation   | 55 $\mu$ g/mL cholesterol | 2 mM mevalonate                        |
|---------------------|----------------------|---------------------------|----------------------------------------|
| Control RNAi        | Healthy gravid adult | Healthy gravid adult      | Healthy gravid adult                   |
| <i>alg-1/2</i> RNAi | Burst                | Burst                     | Burst                                  |
| <i>hmgs-1</i> RNAi  | Burst                | Burst                     | Healthy gravid adult (complete rescue) |

Table S3. Phenotypes of gene inactivations in the *let-7(mg279); [col-19::gfp]* background

| Gene targeted*                                 | Locus          | Description                                                                    | Phenotypes in P <sub>0</sub> animals <sup>†</sup>     | Phenotypes in F <sub>1</sub> animals <sup>‡</sup> |
|------------------------------------------------|----------------|--------------------------------------------------------------------------------|-------------------------------------------------------|---------------------------------------------------|
| Mevalonate pathway                             |                |                                                                                |                                                       |                                                   |
| T02G5.8                                        | <i>kat-1</i>   | Acetyl-CoA acetyltransferase                                                   | Burst and sterile; fail to express <i>col-19::gfp</i> | nd                                                |
| T02G5.7                                        |                | Acetyl-CoA acetyltransferase                                                   |                                                       |                                                   |
| T02G5.4                                        |                | Acetyl-CoA acetyltransferase                                                   |                                                       |                                                   |
| F53A2.7                                        |                | Acetyl-CoA acetyltransferase                                                   |                                                       |                                                   |
| B0303.3                                        |                | Acetyl-CoA acetyltransferase                                                   |                                                       |                                                   |
| F25B4.6                                        |                | <i>hmgs-1</i>                                                                  |                                                       |                                                   |
| F08F8.2                                        | <i>hmgr-1</i>  | HMG-CoA reductase                                                              | Weak <i>col-19::gfp</i>                               |                                                   |
| Y42G9A.4                                       | <i>mvk-1</i>   | Mevalonate kinase                                                              |                                                       |                                                   |
| Y48B6A.13                                      |                | Mevalonate pyrophosphate decarboxylase                                         |                                                       |                                                   |
| R06C1.2                                        | <i>fdps-1</i>  | Polyprenyl synthetase                                                          | Weak <i>col-19::gfp</i>                               |                                                   |
| Protein prenylation                            |                |                                                                                |                                                       |                                                   |
| R02D3.5                                        | <i>fnta-1</i>  | Farnesyltransferase, α subunit                                                 | Burst                                                 |                                                   |
| F23B12.6                                       | <i>fntb-1</i>  | β subunit of farnesyltransferase                                               |                                                       |                                                   |
| Y48E1B.3                                       |                | Geranylgeranyltransferase type I, β subunit                                    | Arrested at L3                                        |                                                   |
| M57.2                                          |                | Geranylgeranyltransferase type II, α subunit                                   |                                                       |                                                   |
| B0280.1                                        | <i>ggtb-1</i>  | Geranylgeranyltransferase type II, β subunit                                   |                                                       |                                                   |
| Coenzyme Q biosynthesis                        |                |                                                                                |                                                       |                                                   |
| C24A11.9                                       | <i>coq-1</i>   | <i>Trans</i> -prenyltransferases                                               | Arrested at L2                                        |                                                   |
| F57B9.4                                        | <i>coq-2</i>   |                                                                                |                                                       |                                                   |
| Y57G11C.11                                     | <i>coq-3</i>   |                                                                                |                                                       |                                                   |
| K07B1.2                                        | <i>coq-6</i>   |                                                                                |                                                       |                                                   |
| ZC395.2                                        | <i>clk-1</i>   |                                                                                |                                                       |                                                   |
| Dolichol synthesis and <i>N</i> -glycosylation |                |                                                                                |                                                       |                                                   |
| Y60A3A.14                                      |                | ALG7 homolog                                                                   | Pale-looking, weak <i>col-19::gfp</i>                 |                                                   |
| R10D12.12                                      |                | UDP- <i>N</i> -acetylglucosamine transferase subunit ALG13 homolog             |                                                       |                                                   |
| M02B7.4                                        |                | UDP- <i>N</i> -acetylglucosamine transferase subunit ALG14 homolog             | Pale-looking, weak <i>col-19::gfp</i>                 |                                                   |
| T26A5.4                                        |                | ALG1 homolog                                                                   |                                                       |                                                   |
| F09E5.2                                        |                | ALG2 homolog                                                                   |                                                       |                                                   |
| B0361.8                                        |                | ALG11 homolog                                                                  |                                                       |                                                   |
| K09E4.2                                        |                | Dolichyl-P-Man:Man(5)GlcNAc(2)-PP-dolichyl mannosyltransferase                 |                                                       |                                                   |
| C14A4.3                                        |                | Mannosyltransferase ALG9 homolog                                               |                                                       |                                                   |
| ZC513.5                                        |                | Mannosyltransferase ALG12 homolog                                              |                                                       |                                                   |
| C08B11.8                                       |                | Glucosyltransferase ALG6 homolog                                               |                                                       |                                                   |
| C08H9.3                                        |                | Glucosyltransferase ALG8 homolog                                               |                                                       |                                                   |
| T24D1.4                                        | <i>tag-179</i> | α-1,2 glucosyltransferase ALG10 homolog                                        |                                                       |                                                   |
| T22D1.4                                        |                | Oligosaccharyltransferase, α subunit (ribophorin I)                            | Fail to express <i>col-19::gfp</i>                    | nd                                                |
| M01A10.3                                       | <i>ostd-1</i>  | Oligosaccharyltransferase subunit; ortholog of yeast SWP1, human ribophorin II | Fail to express <i>col-19::gfp</i>                    | nd                                                |
| T09A5.11                                       | <i>ostb-1</i>  | Oligosaccharyltransferase subunit; ortholog of yeast WBP1, human OST48         | Fail to express <i>col-19::gfp</i>                    | nd                                                |

**Table S3. Cont.**

| Gene targeted*                 | Locus        | Description                                                            | Phenotypes in P <sub>0</sub> animals <sup>†</sup> | Phenotypes in F <sub>1</sub> animals <sup>‡</sup> |
|--------------------------------|--------------|------------------------------------------------------------------------|---------------------------------------------------|---------------------------------------------------|
| F57B10.10                      | <i>dad-1</i> | Oligosaccharyltransferase subunit; ortholog of yeast OST2, human DAD-1 | Fail to express <i>col-19::gfp</i>                | nd                                                |
| T12A2.2                        |              | Oligosaccharyltransferase, STT3 subunit                                | Fail to express <i>col-19::gfp</i>                | nd                                                |
| Heme A and heme O biosynthesis |              |                                                                        |                                                   |                                                   |
| Y46G5A.2                       |              | Protoheme IX farnesyltransferase                                       |                                                   |                                                   |
| T06D8.5                        |              | Cytochrome oxidase assembly factor COX15                               |                                                   |                                                   |
| tRNA isopentenylation          |              |                                                                        |                                                   |                                                   |
| ZC395.6                        | <i>gro-1</i> | tRNA isopentenylpyrophosphate transferase                              |                                                   |                                                   |

If animals appeared WT after RNAi, cell is left empty. nd, not determined.

\*The gene targeted by the RNAi clone was confirmed by sequencing.

<sup>†</sup>RNAi was initiated starting at the L1 stage, and the phenotypes were scored after the L4-to-adult molt.

<sup>‡</sup>RNAi was initiated starting at the L1 stage of P<sub>0</sub> animals, and the phenotypes were scored in progeny. However, the phenotypes were not determined if the RNAi caused lethality/sterility in P<sub>0</sub> animals.
